# Supplementary material
Source: PubMed Central journal article supplement (PMC1289416)

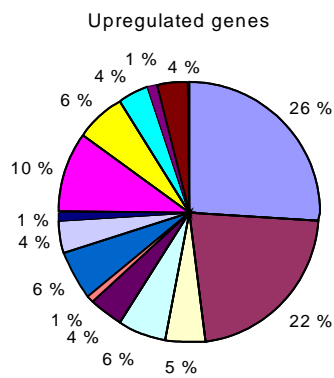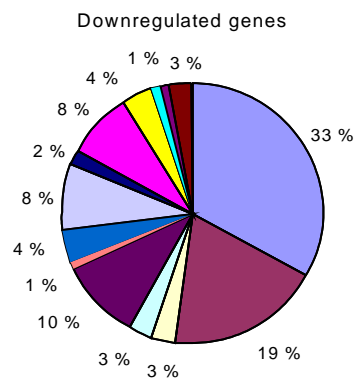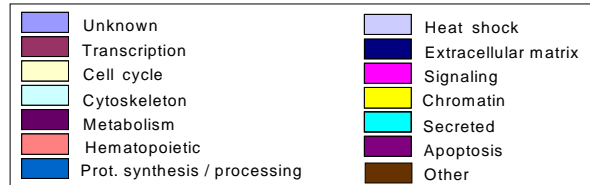

Supplement: mbc_E05-06-0572_1.pdf [file mbc_E05-06-0572_1.pdf]

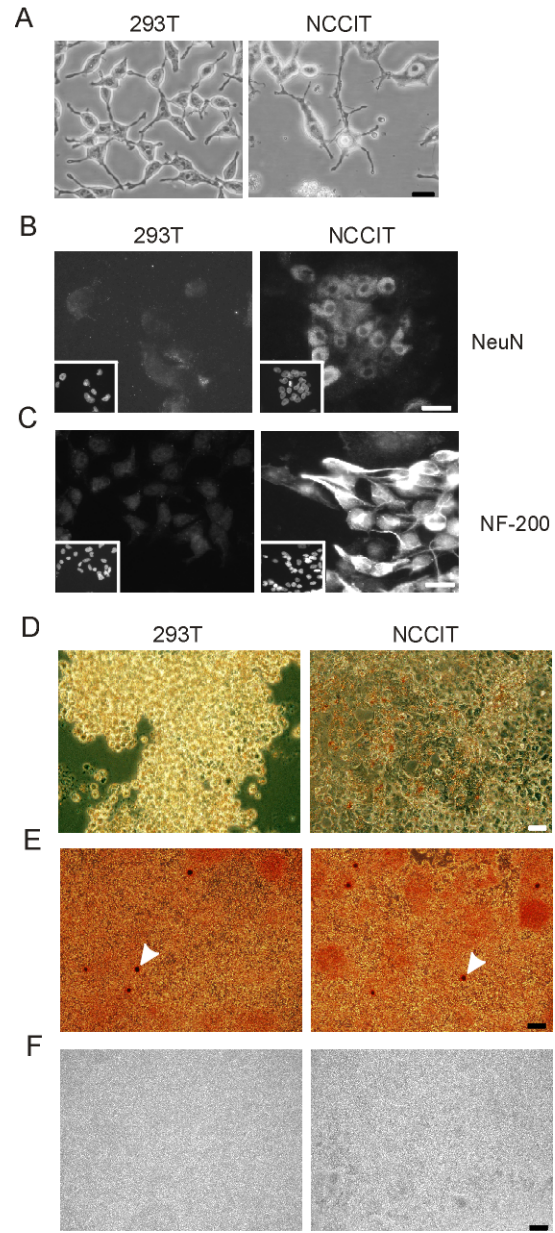

Supplement: mbc_E05-06-0572_2.pdf [file mbc_E05-06-0572_2.pdf]
